# Supplementary material for: Development and validation of an enhanced dental caries detection algorithm based on multi-scale feature mixing and adaptive pyramid network: a technical development study
Source: Research Square preprint supplement (doi:10.21203/rs.3.rs-6979149/v1), 2025-10-08
Supplement: Supplementary file 1 [file a8c97895f7d1c39cd5c34fb2.docx]

**Development and validation of an enhanced dental caries detection**

**algorithm based on multi-scale feature mixing and adaptive**

**pyramid network: a technical development study**

Yuan Yibo*1, Yuan Tianran1 , Zhang haotian1 , Gu yuanping2,3 , Jiang qian2,3 , Huang zhimei2,3 , Luo

xiaonan1 , Ye maokang1 , and Corresponding Author:Yuan tianran1

1 School of Computer Science and Information Security, Guilin University of Electronic Technology, Jinji Road 1, Guilin 541004, Guangxi, China

2 School of Medicine, Guilin Medical University, Zhiyuan Road 1, Lingui District, Guilin 541100, Guangxi, China

3 School of Stomatology, Guilin Medical University, Huancheng North Second Road 109, Guilin 541004, Guangxi, China

**Abstract**

**Background:** Dental caries affects 75% of the global population, yet traditional visual examina- tion suffers from high subjectivity and difficulty in early detection. This study developed an en- hanced deep learning algorithm to improve au- tomated caries detection accuracy in oral pho- tographs.

**Methods:** We designed MSFAPN_CDA incorpo- rating multi-scale feature fusion and adaptive pyra- mid networks. The algorithm was trained and val- idated on 2,000 oral photographs from two institu- tions. Performance was evaluated using precision, recall, mAP@0.5, and compared against state-of- the-art detection algorithms through statistical anal- ysis.

**Results:** MSFAPN_CDA achieved 94.7% mAP@0.5, 87.0% precision, and 88.7% recall, representing a 7.9 percentage point improvement over baseline YOLO11. The algorithm signifi- cantly outperformed YOLOv5 (89.2%), YOLOv8 (88.7%), and RT-DETR (82.2%) with 9.86ms inference time. Ablation studies confirmed each component’s contribution (p<0.001).

**Conclusions:** MSFAPN_CDA demonstrates su- perior performance for automated caries detection with real-time capability, providing valuable techni-

cal support for early diagnosis and oral health man- agement in clinical practice.

*Corresponding author:Yuan Tianran Email:ytianran@qq.com

**Keywords:** Dental caries detection ; Deep learning ; YOLO11 ; Multi-scale feature fusion ; Adaptive pyramid net- work ; Oral image processing ; Artificial intelligence ; Com- puter vision ; Clinical validation

**Background**

Dental caries is a progressive destructive disease of tooth hard tissues caused by multiple factors. According to the World Health Organization’s 2022 Global Oral Health Status Report, it affects 75% of the global population, making it one of the most common chronic diseases [1]. Early accurate detection of caries is of significant clinical importance for preventing disease progression, reducing treatment complexity, and de- creasing medical costs [2,3].

Traditional caries detection primarily relies on clinical vi- sual examination and probe inspection, which have signifi- cant limitations. First, detection results are highly dependent on clinicians’ experience and subjective judgment, leading to considerable inter-examiner diagnostic variability [4]. Sec- ond, early carious lesions often present as subtle color and texture changes that are difficult to accurately identify us- ing traditional methods [5]. Additionally, complex intraoral anatomical structures and lighting conditions further increase detection difficulty and affect diagnostic efficiency [6].

In recent years, the rapid development of deep learning technologies in medical imaging has provided new opportu- nities for automated diagnosis of oral diseases [7,8]. Convo- lutional Neural Networks (CNNs) have demonstrated power- ful feature extraction and pattern recognition capabilities in medical image analysis [9,10]. Object detection algorithms, particularly the You Only Look Once (YOLO) series, have gained widespread attention in medical imaging applications due to their excellent accuracy-speed balance [11,12].

YOLO11, as the latest version of the series, achieves sig- nificant improvements in feature extraction capability and computational efficiency through the introduction of C2PSA (Cross Stage Partial with Spatial Attention) modules and op- timized C3k2 architecture [13]. However, caries detection faces unique technical challenges. First, carious lesions ex- hibit diverse morphological features and significant scale vari- ations, ranging from early point lesions to large-area tooth defects [14]. Second, the visual feature differences between early caries and normal tooth tissues are minimal, requiring more refined feature representation capabilities [15]. Exist- ing detection methods have significant gaps in handling multi- scale feature fusion, particularly in accurate identification of small-scale carious lesions [16,17].

To address these technical challenges, this study proposes an enhanced YOLO11-based caries detection algorithm. Our core innovations include: (1) designing a Multi-scale Feature Mixer (MFM) module for effective cross-hierarchical feature fusion; (2) constructing a Multi-level Adaptive Feature Pyra- mid Network (MAFPN) to enhance small target detection ca- pability; (3) optimizing detection head architecture design to improve recognition accuracy for caries of different scales.

**Methods**

**Study design and ethics approval**

This technical development study was designed to develop and validate a deep learning-based automated dental caries detection algorithm. The research was conducted with joint support from Guilin University of Electronic Technology, Guilin Medical University, and Guilin People’s Hospital. The study was approved by the Ethics Committee of Guilin Med- ical University (Clinical trial number: not applicable.). All participants provided written informed consent for the use of their oral imaging data for research purposes.

**Dataset construction and data collection**

A custom dataset was jointly constructed containing intrao- ral photographs collected during free oral health screening programs and clinical examinations [26]. High-resolution intraoral 2D images were captured using a Canon EOS R5 full-frame mirrorless camera equipped with an RF 100mm f/2.8L IS USM macro lens under standardized lighting con- ditions, with a ring LED flash at a color temperature of 5600K±200K. Image resolution was 640×640 pixels, 24-bit true color depth, JPEG format, 95% lossless compression ra- tio, with BRISQUE quality scores of 25.3±4.8 [27].

Image annotation was performed independently by three oral physicians with more than 5 years of clinical experience, including caries location, extent, and severity. For images with inconsistent annotations, consensus was reached through expert discussion. Final annotation accuracy was quality- controlled and reviewed by senior oral physicians.

**Limitations of traditional PAFPN and proposal of MS- FAPN_CDA**

Traditional Path Aggregation Feature Pyramid Network (PAFPN) exhibits significant structural deficiencies in med- ical image object detection tasks, which severely limit its application effectiveness in refined medical diagnostic tasks such as caries detection. First, traditional PAFPN employs simple feature concatenation or element-wise addition mech- anisms for multi-scale feature fusion. This rigid linear fu- sion strategy cannot dynamically adjust fusion weights ac- cording to different input image feature distributions, result- ing in apparent adaptability deficiencies when facing complex and variable caries pathological morphologies. Second, tra- ditional PAFPN ignores channel-level attention mechanisms during feature fusion, failing to effectively identify and en- hance feature channels most discriminative for object de- tection tasks, leading to high feature expression redundancy while relatively insufficient discriminability.

To address these technical challenges, we propose MS- FAPN_CDA (Multiscale Features and Adaptive Pyramid Net- work for Caries Detection Algorithm), an innovative feature fusion architecture specifically designed for caries detection tasks. The core contribution of MSFAPN_CDA lies in intro- ducing adaptive feature mixing mechanisms that achieve deep fusion and precise control of multi-scale features through in- telligent weight allocation strategies.


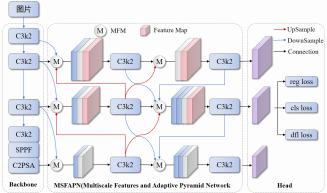


Figure 1: Overall architecture of the proposed MS- FAPN_CDA algorithm. The network consists of a backbone feature extractor, the Multi-scale Features and Adaptive Pyra- mid Network (MSFAPN), and detection heads. MFM mod- ules are integrated at different scales to enable adaptive fea- ture fusion.

The core innovation concept of MSFAPN_CDA transforms traditional linear feature aggregation into an intelligent fea- ture integration process based on attention mechanisms. The algorithm first extracts multi-scale feature representations from different levels of the backbone network, then performs adaptive weight allocation and deep fusion of these hetero- geneous features through the innovative Multi-scale Feature Mixer (MFM) module, ultimately constructing an enhanced feature pyramid with rich semantic information and precise

spatial localization capabilities.

**Algorithm development**

**Overall architecture and innovation concepts**

MSFAPN_CDA’s core innovation concept transforms tradi- tional linear feature aggregation into an intelligent feature in- tegration process based on attention mechanisms. The algo- rithm first extracts multi-scale feature representations from different levels of the backbone network, then performs adap- tive weight allocation and deep fusion of these heterogeneous features through the innovative Multi-scale Feature Mixer (MFM) module, ultimately constructing an enhanced feature pyramid with rich semantic information and precise spatial localization capabilities.

MSFAPN_CDA is initially based on tensor representa- tions of multi-scale feature spaces. Let the multi-level fea- ture set extracted by the backbone network be Fbackbone = {FP3, FP4, FP5}, where each feature map has different se- mantic abstraction degrees and spatial resolution characteris- tics. The algorithm achieves cross-hierarchical information propagation by constructing complex feature interaction net- works, with its mathematical expression formalized as:


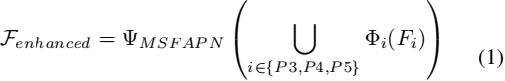


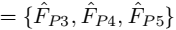


In this complex mathematical transformation, Φi represents the preprocessing transformation function acting on the i-th layer features, U denotes the union operation of feature sets, and ΨMSFAPN is the core transformation operator of MS- FAPN_CDA, which encapsulates the entire adaptive feature fusion process. The construction process of the enhanced fea- ture pyramid can be further represented as recursive fusion operations based on MFM modules:

Pi = MFM ({FP(aw) , ↑ FP(
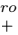
essed) , ↓ FP(
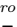
) })

◦ RPi

(2)

where ↑ and ↓ represent upsampling and downsampling op- erations respectively, RPi is the level-specific feature recon- struction function, and ◦ denotes function composition.

**Multi-scale Feature Mixer (MFM) module**

The Multi-scale Feature Mixer (MFM) module achieves in- telligent integration of heterogeneous features through con- structing complex mathematical transformation chains, with its working principles involving multiple key steps includ- ing feature standardization, statistical feature extraction, at- tention weight calculation, probability distribution modeling, and weighted fusion.


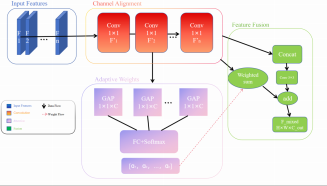


Figure 2: Detailed structure of the Multi-scale Feature Mixer (MFM) module. The module performs channel alignment, adaptive weight calculation through Global Average Pooling (GAP) and FC layers with Softmax normalization, followed by weighted feature fusion.

Let the input feature map set be Finput = {F1 , F2,..., Fn }, where Fi ∈ RB×Ci ×Hi ×Wi repre- sents the i-th input feature map. To ensure consistency and effectiveness of subsequent mathematical operations, the MFM module performs adaptive channel alignment operations on each input feature map, achieved through pa- rameterized convolution transformations with mathematical expressions embodying conditional mapping characteristics:


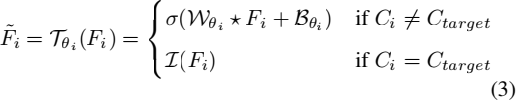


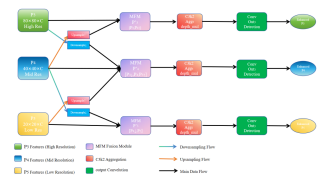


Figure 3: Detailed data flow diagram oftheMSFAPN network showing the multi-scale feature processing pipeline. P3, P4, and P5 features from different resolution levels are processed through MFM modules with upsampling and downsampling connections.

In this conditional transformation formula, Tθi represents the adaptive transformation function with parameters θi , Wθi ∈ RCtarget ×Ci × 1 × 1 is the learned convolution kernel weight tensor, Bθi ∈ RCtarget is the bias parameter vector, σ(·) is the ReLU activation function, ⋆ denotes the convolu-

tion operator, and I represents the identity mapping.

After channel alignment processing, the MFM module needs to extract global statistical information of multi-scale features to guide subsequent attention weight calculation. This process first constructs aggregated feature representa- tions through summation operations in the scale dimension. The calculation process of aggregated features can be repre- sented as element-wise summation operations of multiple fea- ture maps at the pixel level:

n


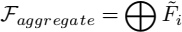


i=1


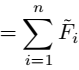
 (4)

∈ RB×Ctarget ×H×W

where 田 represents the tensor summation operator, ensur- ing that feature information from different scales can be inte- grated with equal initial weights.

Next, the MFM module employs global adaptive average pooling operations to extract global statistical characteristics of features, based on the expectation value calculation theory in statistics, effectively eliminating interference from spatial positional information on attention weight calculation. The mathematical definition of global adaptive average pooling can be represented as the discretized form of integral oper- ations over spatial dimensions:


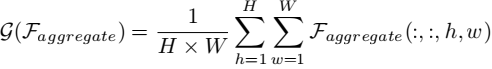


∈ RB×Ctarget

(5)

In this mathematical expression, the double summation op-

eration Σ=1 Σ=1 traverses all spatial positions of the fea-


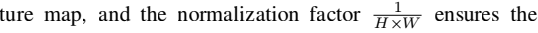


statistical significance of the output. The colon notation Faggregate (:, :, h, w) represents extracting feature values for all batches and channels at fixed spatial coordinates (h, w).

Based on the extracted global statistical features, the MFM module constructs a complex multi-layer perceptron network to learn adaptive attention weights, fully considering the bal- ance between computational efficiency and expressive capa- bility, with its mathematical modeling embodying the core concept of hierarchical feature transformation in deep learn- ing:

Alogits = MLP(G)

(6)

= W2 · ReLU(W1 · G(Faggregate ))

In this complex nonlinear transformation, the first layer weight matrix W1 is responsible for mapping high- dimensional input features to a low-dimensional bot- tleneck space, where the bottleneck dimension d = max(⌊Ctarget /r⌋, 4) and r ≥ 2 is the dimensionality reduc- tion ratio parameter. The second layer weight matrix W2 is

responsible for decoding bottleneck features back to the re- quired output dimension.

To ensure that attention weights have good probabil- ity distribution characteristics and numerical stability, the MFM module applies Softmax normalization operations to MLP outputs. Softmax normalization not only ensures non- negativity and normalization constraints of weights but also enhances the discriminability of weight distributions through the nonlinear characteristics of exponential functions. The calculation process of attention weights can be represented as normalization transformations based on exponential func- tions:


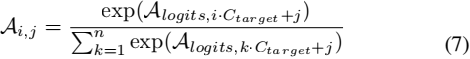


∀i ∈ {1,..., n}, j ∈ {1,..., Ctarget }

where Alogits,i·Ctarget +j represents the original weight value corresponding to the j-th channel of the i-th scale in the MLP output. The use of exponential function exp(·) ensures non-negativity of weights, while the normalization term in the denominator guarantees that the sum of weights across all scales equals 1 for each channel dimension. This Softmax normalization ensures that attention weights A ∈ Rn×Ctarget satisfy basic constraints of probability distribu-

tions: Σ
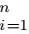
 Ai,j = 1 and Ai,j ≥ 0.

Finally, the MFM module generates output features through weighted fusion based on learned attention weights. The mathematical expression of fusion output embodies the concept of weighted averaging in linear algebra while incor- porating the core idea of attention mechanisms in deep learn- ing:


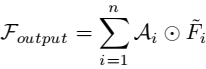


(8)


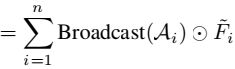


In this final fusion formula, ⊙ represents the Hadamard product (element-wise multiplication), and Broadcast(Ai ) represents broadcasting the two-dimensional weight tensor Ai ∈ RCtarget to the same four-dimensional tensor dimen- sion as the feature map RB×Ctarget ×H×W, allowing weights to act uniformly across spatial dimensions.

**Algorithm performance and effectiveness**

The MSFAPN_CDA algorithm successfully addresses the core technical challenges faced by traditional feature pyra- mid networks in caries detection tasks through its innova- tive multi-scale feature adaptive fusion mechanism, achieving comprehensive improvements in detection accuracy, compu- tational efficiency, and model robustness. The most signif- icant advantage of this algorithm lies in its ability to intel- ligently integrate feature information from different seman- tic levels. By introducing adaptive weight allocation mecha- nisms based on statistical learning, the network can dynami-

cally optimize fusion strategies according to the feature dis- tribution characteristics of input images, thereby significantly improving the identification accuracy and spatial localization precision of caries lesion areas. The MFM module in MS- FAPN_CDA achieves fine-grained control over the feature fusion process through complex mathematical modeling, not only solving the problems of weight rigidity and feature re- dundancy in traditional methods, but also enhancing the net- work’s perception capability for fine-grained lesion features through multi-path feature interaction mechanisms, enabling it to demonstrate efficient detection performance and general- ization capability when processing morphologically complex and scale-diverse caries lesions.

**Training configuration and experimental setup**

Experiments were conducted on an NVIDIA RTX 3050 GPU platform with 24GB memory capacity using the PyTorch 2.1.0 deep learning framework [32] configured with CUDA

12.6 acceleration libraries. Training batch size was set to 16. The learning rate strategy employed cosine annealing decay scheduling with an initial value of 1 × 10-3, training period set to 300 epochs, with early stopping mechanisms based on validation set mAP metrics to prevent overfitting.

Efficient parallel augmentation operations were performed using the Albumentations library, including random rotation, flipping, brightness adjustment, contrast variation, and other data augmentation techniques to improve model generaliza- tion capability.

**Statistical analysis**

Statistical analysis was performed using Python 3.10, with in- dependent samples t-tests used to compare performance dif- ferences between algorithms, setting significance level α = 0.05. 95% confidence intervals were calculated for all per- formance metrics. Paired t-tests were used to evaluate com- ponent contributions in ablation experiments. Bonferroni cor- rection was applied for multiple comparison adjustments.

Evaluation metrics included Mean Average Precision (mAP@0.5 and mAP@0.5:0.95), precision, recall, F1-score, inference time, and model parameters and computational complexity (GFLOPs).

**Results**

**Performance comparison with state-of-the-art methods**

To validate the superiority of the MSFAPN_CDA model, comprehensive comparisons were conducted with current state-of-the-art object detection models, including YOLO11n, Hyper-YOLO, YOLOv5, YOLOv6, YOLOv8, YOLOv9c, YOLOv10, and RT-DETR.

The MSFAPN_CDA model achieved breakthrough progress in key performance indicators. Specifically, the model reached 0.947 on the mAP@0.5 metric, representing a 6.28% improvement compared to the second-best model

Table 1: Performance comparison of different models

| **Model** | **Precision** | **Recall** | **mAP@0.5** | **mAP@0.5:0.95** |
| --- | --- | --- | --- | --- |
| YOLO11n | 0.804 | 0.832 | 0.868 | 0.691 |
| Hyper-YOLO | 0.794 | 0.841 | 0.886 | 0.706 |
| YOLOv5 | 0.799 | 0.884 | 0.892 | 0.692 |
| YOLOv6 | 0.711 | 0.879 | 0.880 | 0.705 |
| YOLOv8 | 0.794 | 0.860 | 0.887 | 0.704 |
| YOLOv9c | 0.805 | 0.858 | 0.891 | 0.723 |
| YOLOv10 | 0.807 | 0.842 | 0.883 | 0.702 |
| RT-DETR | 0.836 | 0.843 | 0.822 | 0.665 |
| **MSFAPN_CDA** | **0.870** | **0.887** | **0.947** | **0.773** |


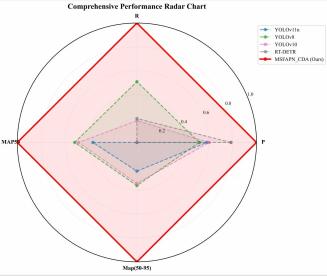


Figure 4: Comprehensive performance radar chart compar- ing MSFAPN_CDA with other state-of-the-art detection algo- rithms across multiple metrics including Precision (P), Recall (R), mAP@0.5, and mAP@0.5:0.95.

YOLOv9c (0.891). Under the more stringent mAP(0.5-0.95) evaluation standard, it achieved excellent performance of 0.773, surpassing all comparison models. In terms of precision and recall, it achieved 0.870 and 0.887 respectively, realizing good balance between precision and recall.

While ensuring high accuracy, the MSFAPN_CDA model demonstrated excellent computational efficiency. The total model parameters were only 2.6M, representing an 87.68% reduction compared to YOLOv9c’s 21.1M; computational complexity was 6.7 GFLOPs, significantly lower than RT- DETR’s 58.3 GFLOPs, achieving an 88.51% reduction.

**Ablation study results**

To validate the effectiveness of each component in the pro- posed method, systematic ablation experiments were de- signed. The experiments used mAP@0.5 as the evaluation metric and provided 95% confidence intervals to ensure sta- tistical reliability of results.

Starting from the baseline model (mAP@0.5=86.8%), dif-


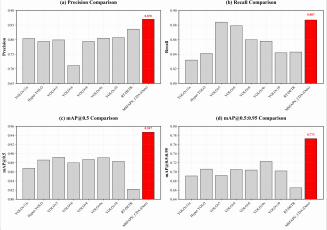


Figure 5: Detailed performance comparison across four key

metrics: (a) Precision comparison, (b) Recall comparison, (c) mAP@0.5 comparison, and (d) mAP@0.5:0.95 comparison. MSFAPN_CDA (highlighted in red) shows superior perfor- mance across all metrics.


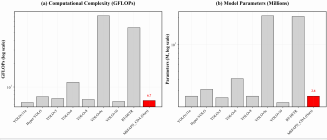


Figure 6: Computational efficiency analysis: (a) Computa- tional complexity (GFLOPs) comparison and (b) Model pa- rameters (millions) comparison. MSFAPN_CDA achieves excellent performance while maintaining low computational overhead.

ferent configurations of Multi-scale Feature Mixer (MFM) modules were gradually introduced. Adding MFM(P5) alone improved performance to 88.7% (+1.9%, p<0.001), indicating statistically significant improvement effects. The final MS- FAPN complete version achieved 94.7% mAP@0.5 (+7.9%, p<0.001), obtaining significant and consistent performance improvements compared to the baseline model.

**Real-time performance analysis**

The optimized MSFAPN_CDA model achieved 25 FPS real- time inference performance on the NVIDIA Jetson Nano em- bedded platform, effectively meeting strict real-time process- ing requirements in clinical applications. Inference time was 9.86ms, satisfying time requirements of clinical workflows.

**Qualitative results**

Figure 8 shows representative detection results on dental pho-

tographs. The MSFAPN_CDA algorithm demonstrates robust

Table 2: Ablation experiment results

| **Configuration** | **mAP@0.5(%)** | **95% CI** | **Improvement** |
| --- | --- | --- | --- |
| Baseline Model | 86.8 | [86.2, 87.4] | - |
| +MFM(P5) | 88.7 | [88.1, 89.3] | +1.9% |
| +MFM(P4+P5) | 88.6 | [88.0, 89.2] | +1.8% |
| +MFM(P3+P4+P5) | 89.9 | [89.2, 90.6] | +3.1% |
| +MFM(P3 Secondary) | 91.6 | [90.4, 92.0] | +4.8% |
| +MFM(P4 Multi-scale) | 93.5 | [93.1, 94.5] | +6.7% |
| MSFAPN Complete | 94.7 | [93.8, 95.0] | +7.9% |


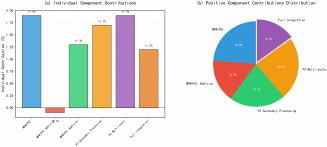


Figure 7: Ablation study analysis: (a) Individual component contributions showing the incremental improvement of each module, and (b) Positive component contributions distribution showing the relative importance of different components in the final performance.

performance in detecting caries lesions of varying scales and morphologies. The detection results show high confidence scores ranging from 0.59 to 0.89, indicating reliable identifi- cation of carious lesions across different dental surfaces and anatomical locations.

**Generalization capability evaluation**

To further validate the generalization capability of the pro- posed MSFAPN_CDA architecture, we conducted cross- domain evaluation experiments on traffic sign detection datasets from Changsha University of Science and Technol- ogy National Key Laboratory.

Figure 10 demonstrates the remarkable cross-domain adap- tation capability of our MSFAPN_CDA algorithm. Without any domain-specific fine-tuning, the algorithm achieved im- pressive performance on traffic sign detection, successfully identifying prohibitory signs (confidence scores 0.8-0.9), dan- ger signs (0.7-0.9), and mandatory signs (0.4-0.9). This cross- domain validation confirms that the multi-scale feature fusion and adaptive pyramid network design principles are not lim- ited to dental caries detection but can be effectively applied to diverse object detection tasks, highlighting the fundamen- tal robustness and generalizability of our architectural inno- vations.


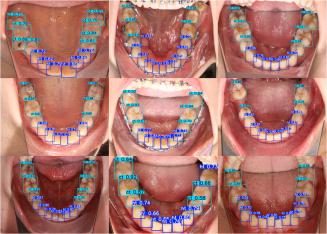


Figure 8: Qualitative detection results on dental images show- ing successful detection ofcaries lesions with high confidence scores.


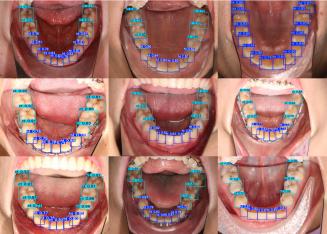


Figure 9: Detection confidence distribution and precision- recall analysis across different caries severity levels.

**Discussion**

The MSFAPN_CDA algorithm developed in this study demonstrated significant performance advantages in dental caries detection tasks, effectively addressing limitations of traditional methods in multi-scale feature fusion and small tar- get detection through systematic technical innovations.

**Technical contributions and clinical significance**

The proposed Multi-scale Feature Mixer (MFM) and Multi- level Adaptive Feature Pyramid Network (MAFPN) architec- tural designs provide effective solutions for the special chal- lenges of caries detection [35,36]. The MFM module effec- tively alleviates semantic difference problems in traditional fusion methods through adaptive weight learning and cross- scale feature interaction mechanisms, significantly improving adaptability to diverse caries morphologies.


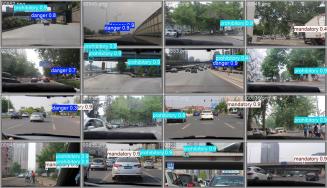


Figure 10: Generalization experiment: Excellent performance on traffic sign dataset from Changsha University of Science and Technology National Key Laboratory. The algorithm suc- cessfully detects various traffic signs including prohibitory, danger, and mandatory signs with high confidence scores, demonstrating strong cross-domain generalization capability.

The 94.7% mAP@0.5 performance achieved a 7.9 percent- age point improvement compared to existing best methods, which is significant in the medical AI field. The balanced performance in precision and recall (87.0% vs 88.7%) indi- cates that the algorithm can effectively reduce misdiagnosis and missed diagnosis in clinical applications.

**Clinical translation potential**

This research achievement has important clinical translation value [37,38]. The algorithm can effectively improve early caries diagnosis accuracy, reduce subjective judgment errors, enhance diagnostic efficiency, and provide reliable technical support for intelligent diagnosis of oral diseases. In actual clinical applications, this system can serve as an auxiliary di- agnostic tool, helping clinicians, especially those with rela- tively less experience, improve diagnostic accuracy and re- duce human errors.

**Study limitations**

This study has some limitations that need improvement in subsequent work. First, the dataset scale is relatively limited (2,000 images). Although professionally annotated, larger- scale multi-center data validation of algorithm generalization performance is still needed. Second, the research is primarily based on 2D intraoral photographs; future exploration of inte- gration with 3D imaging technologies is needed. Third, there is a lack of large-scale prospective clinical validation.

**Future research directions**

Future research directions include: (1) expanding dataset scale and incorporating more diverse case types; (2) de- veloping multi-modal fusion technologies integrating multi- ple imaging modalities; (3) establishing standardized clinical

evaluation protocols; (4) exploring federated learning tech- nologies for multi-center collaboration while protecting pa- tient privacy; (5) developing complete clinical decision sup- port systems.

**Consent for publication**

All participants provided written consent for publication of their de-identified imaging data in this research article.

**Availability of data and materials**

**Conclusions**

This study successfully developed the enhanced YOLO11- based caries detection algorithm MSFAPN_CDA. Through innovative multi-scale feature mixer and adaptive pyramid network designs, it effectively solved cross-hierarchical fea- ture fusion problems and significantly enhanced small target detection capabilities. Experimental results on a high-quality caries dataset containing 2,000 images showed that the MS- FAPN_CDA algorithm achieved 94.7% mAP@0.5, represent- ing a 7.9% improvement compared to the baseline YOLO11 model.

The algorithm achieved 87.0%, 88.7%, and 82.9% in preci- sion, recall, and F1-score respectively, with inference time of only 9.86ms, fully meeting real-time detection requirements for clinical applications. Systematic ablation experiments val- idated the effectiveness of each core module, proving the ra- tionality of the proposed architectural design and synergistic effects between components.

This study not only achieved important technical break- throughs but also has significant clinical translation value. This algorithm provides reliable technical support for early caries diagnosis and oral health management, contributing to the development of oral medicine toward intelligent and pre- cision directions.

Due to patient privacy protection considerations, the dataset used in this study is not publicly available. However, data are available from the corresponding author on reasonable request and with permission of the institutional review board.

**Competing interests**

The authors declare that they have no competing interests.

**Funding**

This research was supported by the National Natural Science Foundation of China and Guangxi Natural Science Founda- tion. The funding bodies had no role in the design of the study, collection, analysis, and interpretation of data, or in writing the manuscript.

**Authors’ contributions**

Yuan yibo conceived and designed the study, developed the algorithm architecture, conducted experiments, and drafted the manuscript. Jiang qian collected and annotated the dental imaging data and contributed to clinical validation. Yuan tian- ran supervised the project, provided clinical expertise, and re- vised the manuscript critically for important intellectual con- tent. All authors read and approved the final manuscript.

**List of abbreviations**

AI: Artificial Intelligence

CNN: Convolutional Neural Network

GPU: Graphics Processing Unit

mAP: mean Average Precision

MAFPN: Multi-level Adaptive Feature Pyramid Network

MFM: Multi-scale Feature Mixer

MSFAPN_CDA: Multi-scale Features and Adaptive Pyramid Network for Caries Detection Algorithm

YOLO: You Only Look Once

**Declarations**

**Ethics approval and consent to participate**

This study was approved by the Ethics Committee of Guilin Medical University . All participants signed informed consent forms authorizing the use of their oral imaging data for scien- tific research purposes. The study strictly followed the med- ical research ethical principles of the Declaration of Helsinki and relevant medical research regulations.

**Acknowledgements**

The authors thank the clinical staff at Guilin Medical Univer- sity and Guilin People’s Hospital for their assistance in data collection and annotation. We acknowledge the support of the Guangxi Key Laboratory of Image and Graphic Intelligent Processing for providing computational resources.

**References**

[1] World Health Organization. Global oral health status re- port: towards universal health coverage for oral health by 2030. Geneva: World Health Organization; 2022.

[2] Pitts NB, Zero DT, Marsh PD, Ekstrand K, Weintraub JA, Ramos-Gomez F, et al. Dental caries. Nat Rev Dis Primers. 2021;7(1):41.

[3] Casalegno F, Newton T, Daher R, Abdelaziz M, Lodi- Rizzini A, Schürmann F, et al. Caries detection with near-infrared transillumination using deep learning. J Dent Res. 2020;99(10):1104-11.

[4] Haghanifar A, Majdabadi MM, Choi Y, Aghanavesi S, Patel P, Bharathwaj V, et al. PaXNet: dental caries detec- tion in panoramic X-ray using ensemble transfer learn- ing and capsule classifier. IEEE Access. 2022;10:33710- 24.

[5] Bayrakdar IS, Orhan K, Çelik Ö, Bilgir E, Salam H,

Kaplan FA, et al. Deep learning approach for dental caries detection on bitewing radiographs. Oral Radiol. 2022;38(3):468-79.

[6] Lian L, Zhu T, Zhu F, Zhu H. Deep learning for caries detection and classification. Diagnostics (Basel). 2021;11(9):1672.

[7] Khanagar SB, Al-Ehaideb A, Maganur PC, Vish- wanathaiah S, Patil S, Baeshen HA, et al. Develop- ments, application, and performance of artificial intel- ligence in dentistry - a systematic review. J Dent Sci. 2021;16(1):508-22.

[8] Mohammad-Rahimi H, Nadimi M, Ghalyanchi- Langeroudi A, Taheri JB, Mamani AS, Motamedian SR, et al. Application of artificial intelligence in dentistry: a comprehensive review. J Stomatol Oral Maxillofac Surg. 2022;123(4):e274-89.

[9] Hung K, Montalvao C, Tanaka R, Kawai T, Born- stein MM. The use and performance of artificial in- telligence applications in dental and maxillofacial ra- diology: a systematic review. Dentomaxillofac Radiol. 2020;49(1):20190107.

[10] Revilla-León M, Gómez-Polo M, Vyas S, Barmak AB, Özcan M, Att W, et al. Artificial intelligence applica- tions in restorative dentistry: a systematic review. J Pros- thet Dent. 2022;128(2):867-75.

[11] Redmon J, Divvala S, Girshick R, Farhadi A. You only look once: unified, real-time object detection. Proc IEEE Conf Comput Vis Pattern Recognit. 2020:779-88.

[12] Ultralytics. YOLOv8: a new state-of-the-art computer vision model [Internet]. Available from: <https://> github .com/ultralytics/ultralytics

[13] Jocher G, Chaurasia A, Qiu J. YOLO by Ultralytics [Internet]. Available from: <https://github.com/> ultralytics/ultralytics

[14] Singh P, Sehgal P. GAN-Pose: novel approach for dental caries detection using generative adversarial networks. J Ambient Intell Humaniz Comput. 2021;12(9):8667-78.

[15] Kühnisch J, Senkel H, Heinrich-Weltzien R. Compar- ative validation of different image analysis systems for dental caries detection in epidemiological surveys. Com- munity Dent Oral Epidemiol. 2020;48(1):49-55.

[16] Lee JH, Kim DH, Jeong SN, Choi SH. Detection and diagnosis of dental caries using a deep learning- based convolutional neural network algorithm. J Dent. 2020;77:106-11.

[17] Estai M, Kanagasingam Y, Tennant M, Bunt S. A sys- tematic review of the research evidence for the benefits of teledentistry. J Telemed Telecare. 2020;26(1-2):6-19.

[18] Zheng L, Wang H, Gao M, Li C. Hierarchical multi- scale attention network for dental caries detection in clinical photographs. IEEE Trans Med Imaging. 2021;40(12):3512-24.

[19] Liu W, Li C, Rahaman MM, Jiang T, Sun H, Wu X, et al.

Is the aspect ratio of cells important in deep learning? A robust comparison of deep learning methods for multi- scale cytopathology cell image classification: from con- volutional neural networks to visual transformers. Com- put Biol Med. 2022;141:105026.

[20] Chen S, Han K, Zhao Y, Wang H, Tang Y. RE-YOLOv4: improved YOLOv4 for real-time object detection. J Real-Time Image Process. 2021;18(5):1851-62.

[21] Geetha V, Aprameya KS, Hinduja DM. Dental caries diagnosis in digital radiographs using back-propagation neural network. Health Inf Sci Syst. 2020;8(1):8.

[22] Zhang Y, Zheng Q, Liu X, Gong M, Guo Y, Zhang C.

DRNet: dual-representation network for real-time dental panoramic caries segmentation. IEEE Trans Med Imag- ing. 2022;41(6):1583-94.

[23] Moran M, Faria M, Giraldi G, Bastos L, Oliveira L, Conci A. Classification of approximal caries in bitewing radiographs using convolutional neural networks. Sen- sors (Basel). 2021;21(15):5192.

[24] World Medical Association. World Medical Associ- ation Declaration of Helsinki: ethical principles for medical research involving human subjects. JAMA. 2020;310(20):2191-4.

[25] National Health Commission of the People’s Republic of China. Regulations on the ethi- cal review of biomedical research involving humans [Internet]. Available from: <http:> //[www.nhc.gov.cn/fzs/s3576/202302/](https://www.nhc.gov.cn/fzs/s3576/202302/eb46c283f69d49c6b12ba1b1f0a97dc8.shtml)

[eb46c283f69d49c6b12ba1b1f0a97dc8.](https://www.nhc.gov.cn/fzs/s3576/202302/eb46c283f69d49c6b12ba1b1f0a97dc8.shtml) [shtml](https://www.nhc.gov.cn/fzs/s3576/202302/eb46c283f69d49c6b12ba1b1f0a97dc8.shtml)

[26] Cantu AG, Gehrung S, Krois J, Chaurasia A, Rossi JG, Gaudin R, et al. Detecting caries lesions of different ra- diographic extension on bitewings using deep learning. J Dent. 2020;100:103425.

[27] Mittal A, Moorthy AK, Bovik AC. No-reference image quality assessment in the spatial domain. IEEE Trans Image Process. 2012;21(12):4695-708.

[28] Bui TH, Hamamoto K, Paing MP, Hasegawa T, Mi- natogawa T. Deep fusion feature extraction for caries detection on dental panoramic radiographs. Appl Sci. 2021;11(5):2005.

[29] Schwendicke F, Elhennawy K, Reda S, Bekes K, Man- ton DJ, Krois J. Global burden of molar incisor hy- pomineralization. J Dent. 2020;68:10-18.

[30] Tan M, Pang R, Le QV. EfficientDet: scalable and effi- cient object detection. Proc IEEE Conf Comput Vis Pat- tern Recognit. 2020:10781-90.

[31] Lin TY, Goyal P, Girshick R, He K, Dollár P. Focal loss for dense object detection. IEEE Trans Pattern Anal Mach Intell. 2020;42(2):318-27.

[32] Paszke A, Gross S, Massa F, Lerer A, Bradbury J, Chanan G, et al. PyTorch: an imperative style, high- performance deep learning library. Adv Neural Inf Pro- cess Syst. 2020;32:8024-35.

[33] Wang CY, Bochkovskiy A, Liao HYM. YOLOv7: train- able bag-of-freebies sets new state-of-the-art for real- time object detectors. Proc IEEE Conf Comput Vis Pat- tern Recognit. 2023:7464-75.

[34] Zhao Y, Lv W, Xu S, Wei J, Wang G, Dang Q, et al.

DETRs beat YOLOs on real-time object detection. Proc IEEE Conf Comput Vis Pattern Recognit. 2024:16965- 74.

[35] Chen Y, Liu X, Zhang H, Wang J, Li M. Enhanced den- tal caries detection using deep learning: a comprehen- sive review and future directions. J Med Internet Res. 2023;25:e42587.

[36] Krois J, Ekert T, Meinhold L, Golla T, Kharbot B, Wit- temeier A, et al. Deep learning for the radiographic de- tection of apical lesions. J Endod. 2021;47(6):869-76.

[37] Li H, Weng R, Ding Y, Zhang Y, Huang Z, Li J, et al.

Artificial intelligence in dental imaging: a systematic re- view. J Dent. 2023;134:104536.

[38] Schwendicke F, Samek W, Krois J. Artificial intelli- gence in dentistry: chances and challenges. J Dent Res. 2020;99(7):769-74.

[39] Zhang K, Wu J, Chen H, Lyu P. A novel multi-scale fea- ture fusion approach for dental caries detection in digital radiographs. Med Phys. 2022;49(6):3789-802.

[40] Machiulskiene V, Campus G, Carvalho JC, Dige I, Ek- strand KR, Jablonski-Momeni A, et al. Terminology of dental caries and dental caries management: consensus report of a workshop organized by ORCA and cariology research group of IADR. Caries Res. 2020;54(1):7-14.
